# Supplementary material for: Murine Cytomegalovirus Exploits Olfaction To Enter New Hosts
Source: PubMed Central journal article supplement (PMC4850257; doi:10.1128/mbio.00251-16), 2016-04-26
Supplement: mbo002162790sf1.pdf [file mbo002162790sf1.pdf]

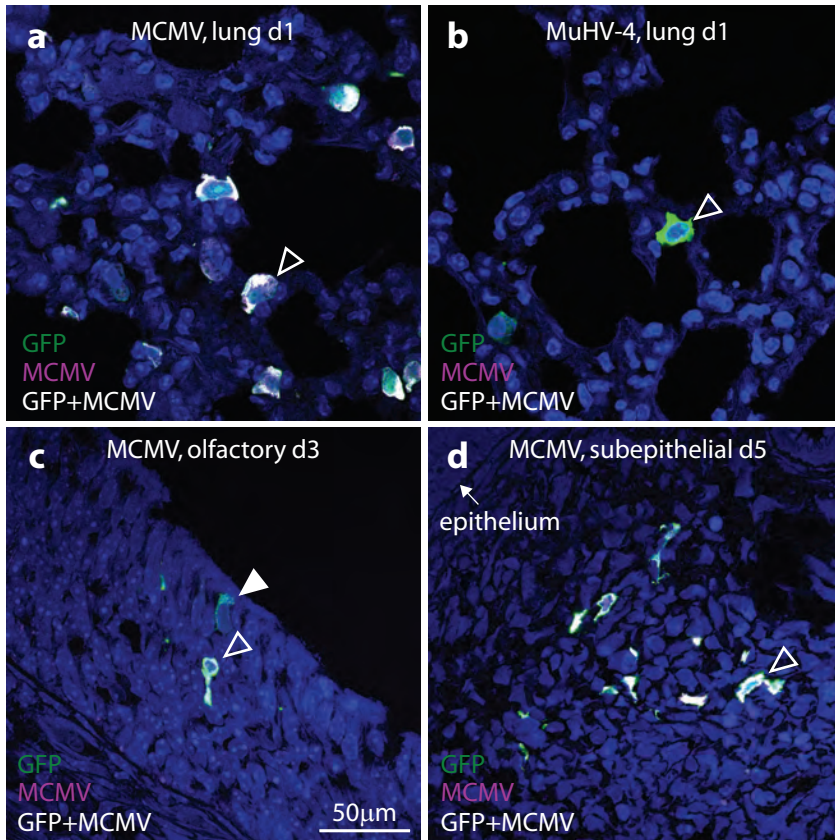

**Figure S1. Infection revealed by viral eGFP expression and lytic antigen staining.**

**a.** Mice were infected i.n. with eGFP<sup>+</sup> MCMV ( $10^5$  p.f.u. in  $30 \mu\text{l}$  under isoflurane anesthesia). 1d later lung sections were stained for eGFP (green) with a polyclonal goat serum and for MCMV antigens (cyan) with a polyclonal rabbit serum. Colocalization appears white. Counterstaining was with DAPI. The arrow shows an example infected cell. All eGFP<sup>+</sup> cells were also MCMV antigen<sup>+</sup>.

**b.** As a negative control, mice were infected i.n. with eGFP<sup>+</sup> MuHV-4 ( $10^5$  p.f.u. in  $30 \mu\text{l}$  under isoflurane anesthesia). 1d later lung sections were stained as in **a**. The arrow shows an infected cell that is eGFP<sup>+</sup> and MCMV antigen<sup>-</sup>.

**c.** Mice were infected i.n. with eGFP<sup>+</sup> MCMV ( $10^5$  p.f.u. in  $5 \mu\text{l}$  without anesthesia). Sections of noses taken 3d later were stained as in **a**. The open arrow shows a lytically infected neuron. The filled arrow shows an eGFP<sup>+</sup> but MCMV antigen<sup>-</sup> sustentacular cell.

**d.** Mice were infected and tissue stained for eGFP and MCMV antigens as in **c**. The open arrow shows an eGFP<sup>+</sup>lytic antigen<sup>+</sup> subepithelial monocyte/macrophage in the region of the nasal-associated lymphoid tissue. No such infection was seen at 1d post-infection.
