# Supplementary material for: Murine Cytomegalovirus Exploits Olfaction To Enter New Hosts
Source: PubMed Central journal article supplement (PMC4850257; doi:10.1128/mbio.00251-16), 2016-04-26
Supplement: mbo002162790sf2.pdf [file mbo002162790sf2.pdf]

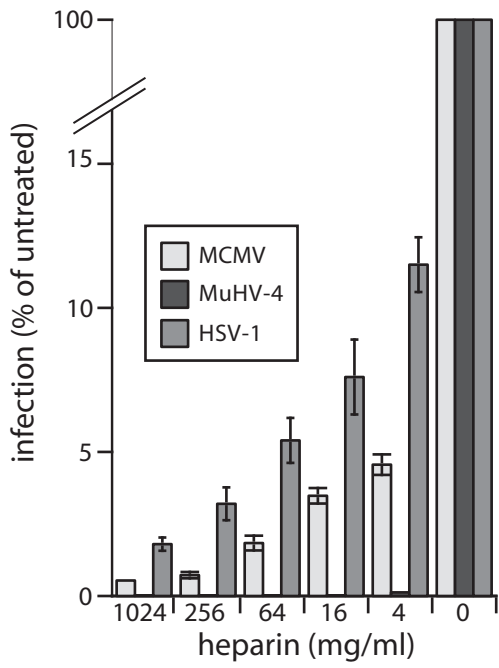

**Figure S2. Heparan dependence of MCMV infection.**

EGFP<sup>+</sup> MCMV, HSV-1 and MuHV-4 were incubated with heparin at varying concentration (2h, 37°C) then added to BHK-21 cell monolayers (0.2 p.f.u./ cell), still in the presence of heparin. 18h later infection was quantitated by flow cytometric assay of eGFP expression. Bars show mean  $\pm$  SD of triplicate infections, each expressed as a percentage of the no heparin control (20-50% of total cells eGFP<sup>+</sup>). The inhibition of each infection by heparin was highly significant ( $p < 10^{-6}$  by  $\chi^2$  test, comparing infected and uninfected populations).
