# Supplementary material for: Murine Cytomegalovirus Exploits Olfaction To Enter New Hosts
Source: PubMed Central journal article supplement (PMC4850257; doi:10.1128/mbio.00251-16), 2016-04-26

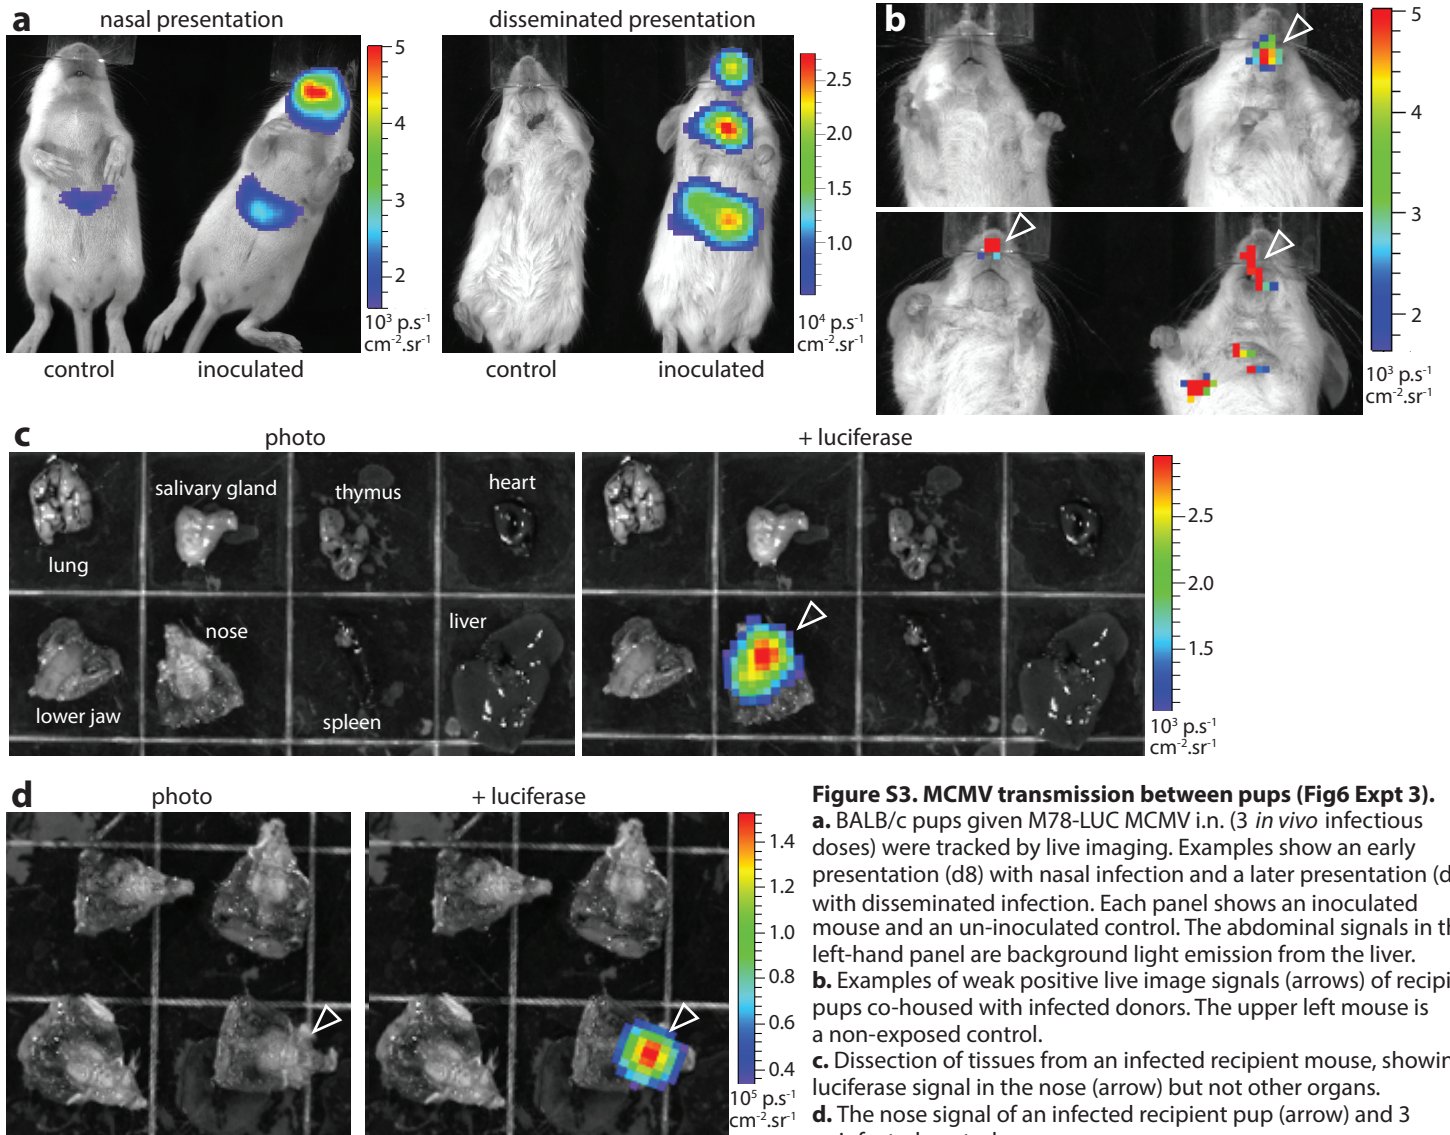

Supplement: mbo002162790sf3.pdf [file mbo002162790sf3.pdf]
