# Supplementary material for: Murine Cytomegalovirus Exploits Olfaction To Enter New Hosts
Source: PubMed Central journal article supplement (PMC4850257; doi:10.1128/mbio.00251-16), 2016-04-26
Supplement: mbo002162790sf4.pdf [file mbo002162790sf4.pdf]

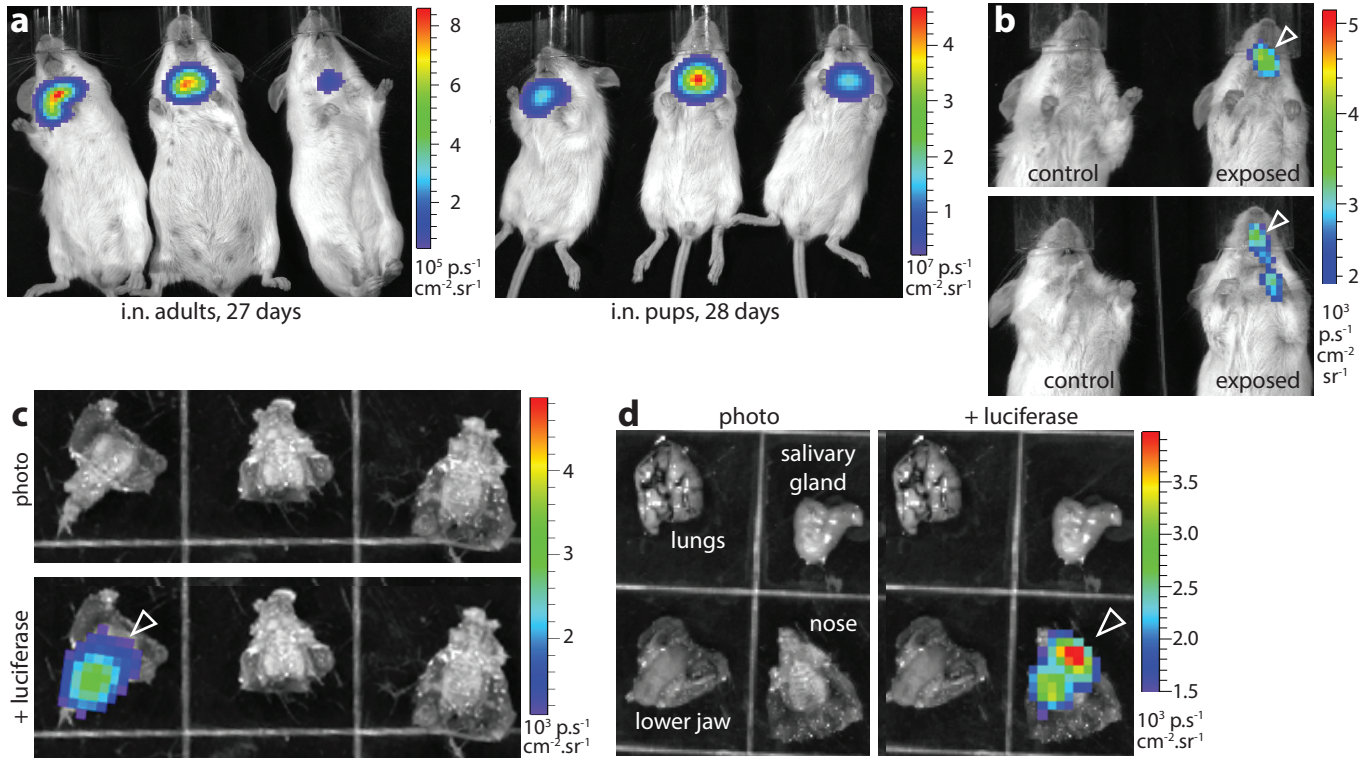

**Figure S4. MCMV transmission from parents to pups (Fig 6a Expt 4).**

**a. Male and female adult** BALB/c mice were infected i.n. with M78-LUC MCMV ( $10^5$  p.f.u. without anesthesia) then mated (left hand panel). By the time of pregnancy (obvious in the middle mouse) approximately 1 month later, live image luciferase signals were restricted to the salivary glands. Signals were generally higher in females (left-hand mice) than in males (right-hand mouse). All were substantially lower than in the donor pups of Fig.6 Expt 3, as shown in the right-hand panel. Note the different scales.

**b.** Example weak positive live image signals of pups with MCMV-infected parents (exposed, arrows), each compared with a control pup of uninfected parents.

**c.** Dissection of noses showing weak positive signal in an example pup with MCMV-infected parents (arrow) compared with noses of 2 control pups with uninfected parents.

**d.** Dissection of an example pup with infected parents, showing weak positive signal in the nose and not in other organs.
